# Supplementary material
Source: Springer Nature journal article supplement (https://www.springermedizin.de/resource/supplementary/13223_2014_498_MOESM4_ESM.pdf/9596656)

**A**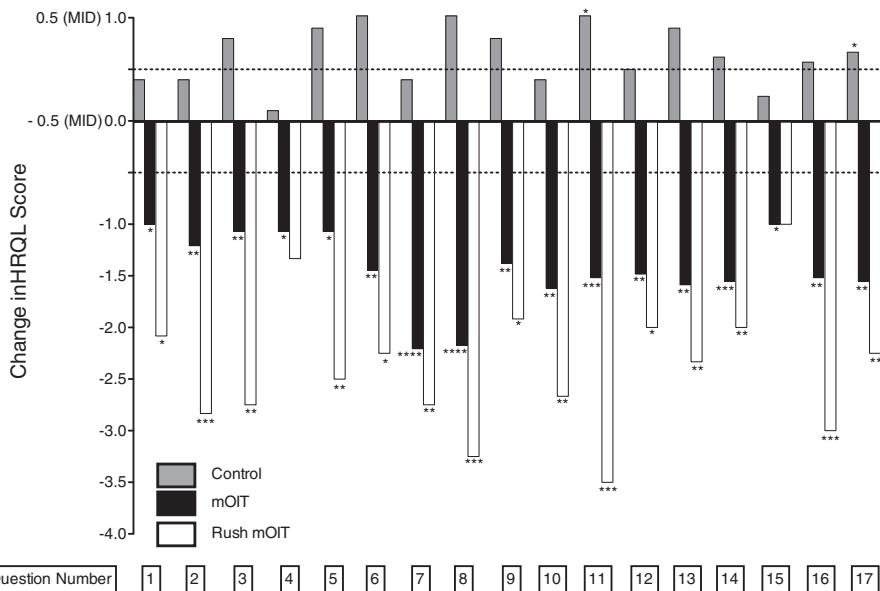**B**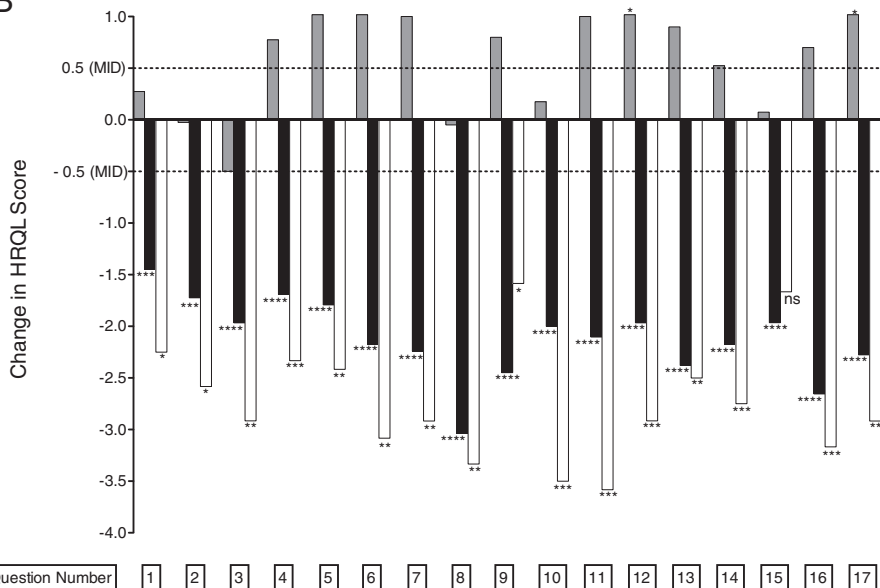

Supplement: MOESM4 [file 9596656]
